# Supplementary material for: Cardiovascular Outcomes and Mortality After Bariatric Surgery in Patients With Nonalcoholic Fatty Liver Disease and Obesity
Source: PubMed Central journal article supplement (PMC10082402; doi:10.1001/jamanetworkopen.2023.7188), 2023-04-07
Supplement: jamanetwopen-e237188-s002.pdf [file jamanetwopen-e237188-s002.pdf]

## Data Sharing Statement

Krishnan. Cardiovascular Outcomes and Mortality in After Bariatric Surgery in Patients With Nonalcoholic Fatty Liver Disease and Obesity. *JAMA Netw Open*. Published April 07, 2023. doi:10.1001/jamanetworkopen.2023.7188

### Data

**Data available:** No

### Additional Information

**Explanation for why data not available:** No additional data is available.
